# Supplementary material for: Biomimetic assembly of calcite microtrumpets: crystal tectonics in actionElectronic supplementary information (ESI) available: XRD pattern of trumpet-shaped structure. See http://www.rsc.org/suppdata/cc/b4/b401754d/
Source: Royal Society of Chemistry journal article supplement (doi:10.1039/b401754d), 2004-01-01
Supplement: b401754d.doc [file b401754d.doc]

**SUPPLEMENTARY MATERIAL**

**XRD pattern of trumpet-shaped structure:**

The pattern corresponds to the calcite phase of calcium carbonate. The sample was measured at room temperature on a STOE Powder Diffraction System with monochromated Co radiation.
